# Supplementary material
Source: PubMed Central journal article supplement (PMC7887752)
Supplement: ic0c03452_si_001.pdf [file ic0c03452_si_001.pdf]

# Supporting information

## Low temperature nitridation of Fe<sub>3</sub>O<sub>4</sub> by reaction with NaNH<sub>2</sub>

*Sarah E. O'Sullivan<sup>1</sup>, Shi-Kuan Sun<sup>1\*</sup>, Sebastian M. Lawson<sup>1</sup>, Martin C. Stennett<sup>1</sup>,  
Feihong Chen<sup>1</sup>, Yuji Masubuchi<sup>2</sup>, Claire L. Corkhill<sup>1</sup>, Neil C. Hyatt<sup>1\*</sup>.*

1. Immobilisation Science Laboratory, University of Sheffield, Department of Materials Science & Engineering, Sir Robert Hadfield Building, Mappin Street, Sheffield, S1 3JD, UK.
2. Faculty of Engineering, Hokkaido University, N13W8, Kita-ku, Sapporo, 060-8628, Japan

\*Corresponding author e-mail: [shikuan.sun@sheffield.ac.uk](mailto:shikuan.sun@sheffield.ac.uk) ; [n.c.hyatt@sheffield.ac.uk](mailto:n.c.hyatt@sheffield.ac.uk)

| Collection Code | Space Group | Formula                       | Volume ( $\text{\AA}^3$ ) | Temperature (K) | Year | Quality Data | DOI                           |
|-----------------|-------------|-------------------------------|---------------------------|-----------------|------|--------------|-------------------------------|
| 79982           | $P6_322$    | $\text{Fe}_3\text{N}$         | 84.24                     | 298             | 1995 | *            | 10.1016/0925-8388(95)01610-4  |
| 79983           | $P6_322$    | $\text{Fe}_3\text{N}$         | 83.71                     | 295             | 1995 | *            | 10.1016/0925-8388(95)01610-4  |
| 80930           | $P6_322$    | $\text{Fe}_3\text{N}$         | 83.63                     | 293             | 1995 | *            | No DOI                        |
| 93173           | $P6_322$    | $\text{Fe}_3\text{N}_{1.107}$ | 84.48                     | 293             | 2001 |              | 10.1016/S0925-8388(00)01435-3 |
| 93174           | $P6_322$    | $\text{Fe}_3\text{N}_{1.239}$ | 85.69                     | 293             | 2001 |              | 10.1016/S0925-8388(00)01435-3 |
| 93175           | $P6_322$    | $\text{Fe}_3\text{N}_{1.3}$   | 86.63                     | 293             | 2001 |              | 10.1016/S0925-8388(00)01435-3 |
| 93176           | $P6_322$    | $\text{Fe}_3\text{N}_{1.33}$  | 87.05                     | 293             | 2001 |              | 10.1016/S0925-8388(00)01435-3 |
| 93177           | $P6_322$    | $\text{Fe}_3\text{N}_{1.39}$  | 87.60                     | 293             | 2001 |              | 10.1016/S0925-8388(00)01435-3 |
| 93183           | $P6_322$    | $\text{Fe}_3\text{N}_{1.1}$   | 84.49                     | 293             | 2001 |              | 10.1016/S0925-8388(00)01435-3 |
| 93195           | $P6_322$    | $\text{Fe}_3\text{N}_{1.235}$ | 85.59                     | 293             | 2001 |              | 10.1016/S0925-8388(00)01435-3 |
| 162698          | $P6_322$    | $\text{Fe}_3\text{N}_{1.2}$   | 84.77                     | 293             | 2009 |              | 10.1021/cm802721k             |
| 163929          | $P6_322$    | $\text{Fe}_3\text{N}_{0.97}$  | 83.00                     | 293             | 2009 | *            | 10.1016/j.jallcom.2008.09.178 |
| 420214          | $P6_322$    | $\text{Fe}_3\text{N}_{1.47}$  | 88.39                     | 293             | 2009 | *            | 10.1002/ejic.200801222        |

Table S1: Cell volume and formula data for  $\epsilon\text{-Fe}_{2+x}\text{N}$  mined from the ICSD [28] and used to build the calibration and subsequent stoichiometry estimation shown in Figure S1. Note – quality data highlights with an asterisk data considered to be of highest quality by ICSD.

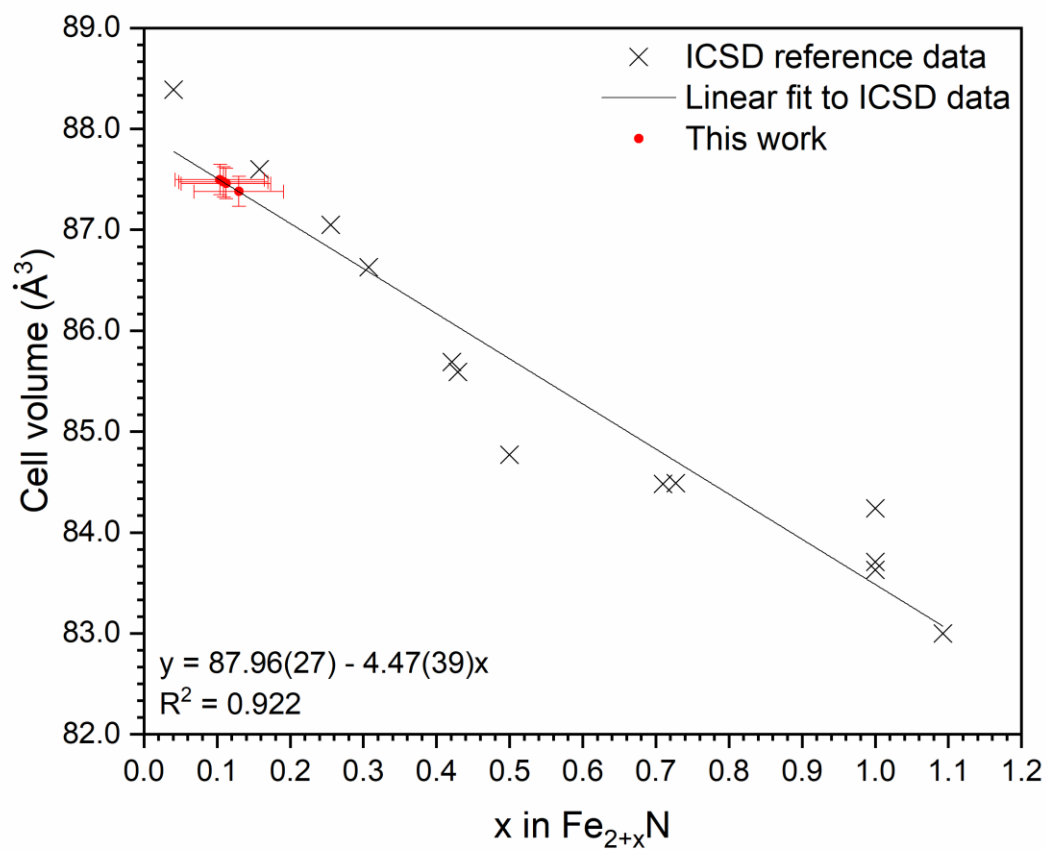

Figure S1: Dependence of unit cell volume on stoichiometry  $x$  in  $\epsilon$ -Fe<sub>2+x</sub>N assuming a linear dependence. Black crosses indicate data for  $P6_322$   $\epsilon$ -Fe<sub>2+x</sub>N data sourced from the ICSD (Table S1), normalised to the Fe<sub>2+x</sub>N composition. The applied linear fit was then used to calculate the estimated  $x$  values for the data points in this work shown in red.

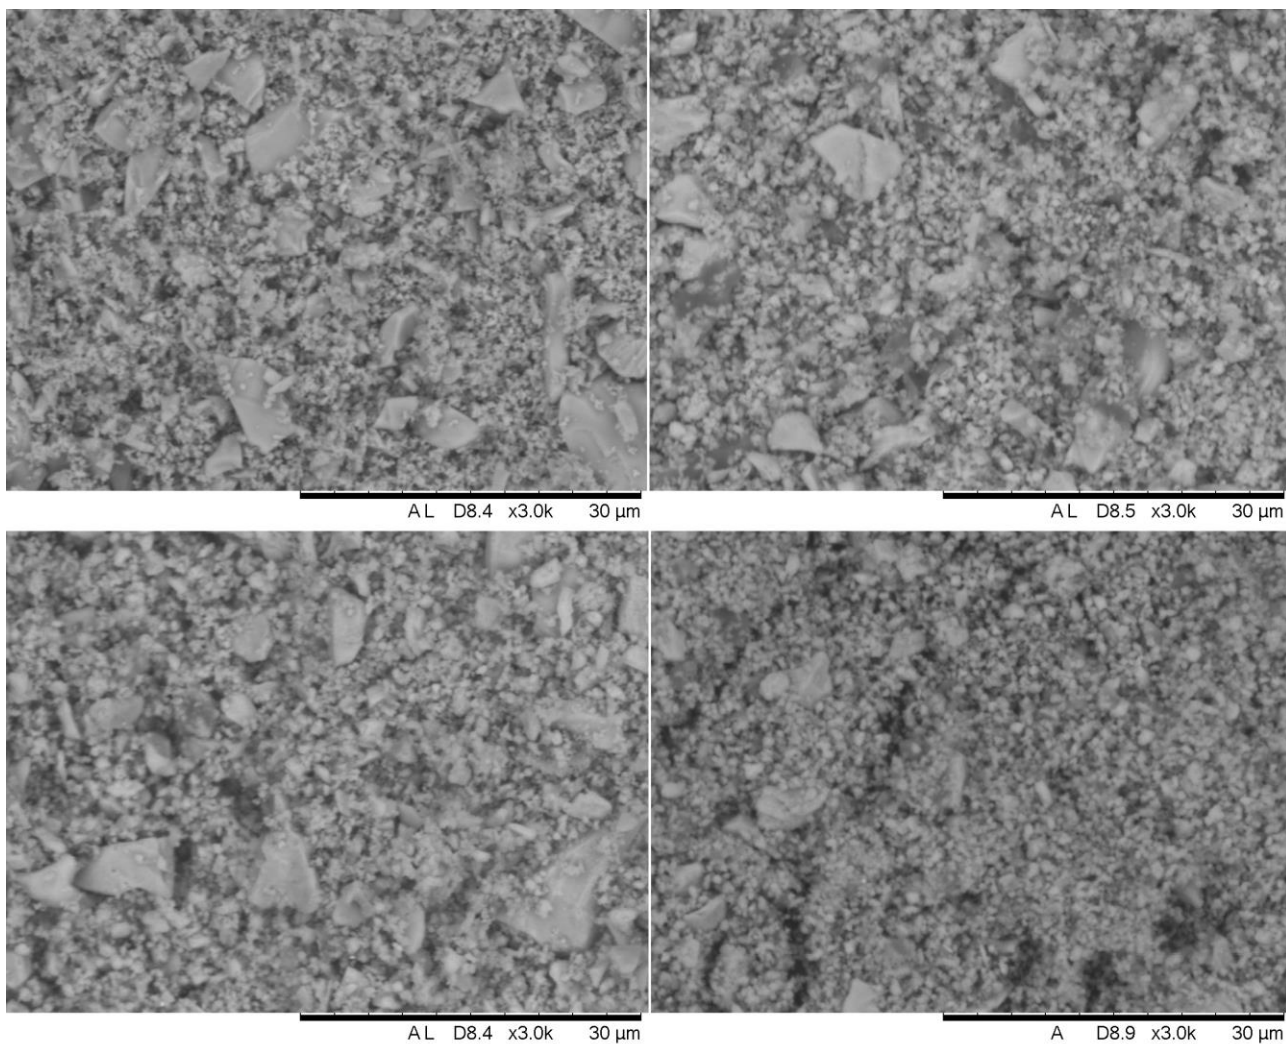

Figure S2: SEM images of raw and  $\text{Fe}_3\text{O}_4$  powders reacted with  $\text{NaNH}_2$  at  $170\text{ }^\circ\text{C}$  for 24, 48 and 96 h. Top row L-R: untreated  $\text{Fe}_3\text{O}_4$ , 24 h product. Bottom row L-R: 48 h product, 96 h product.

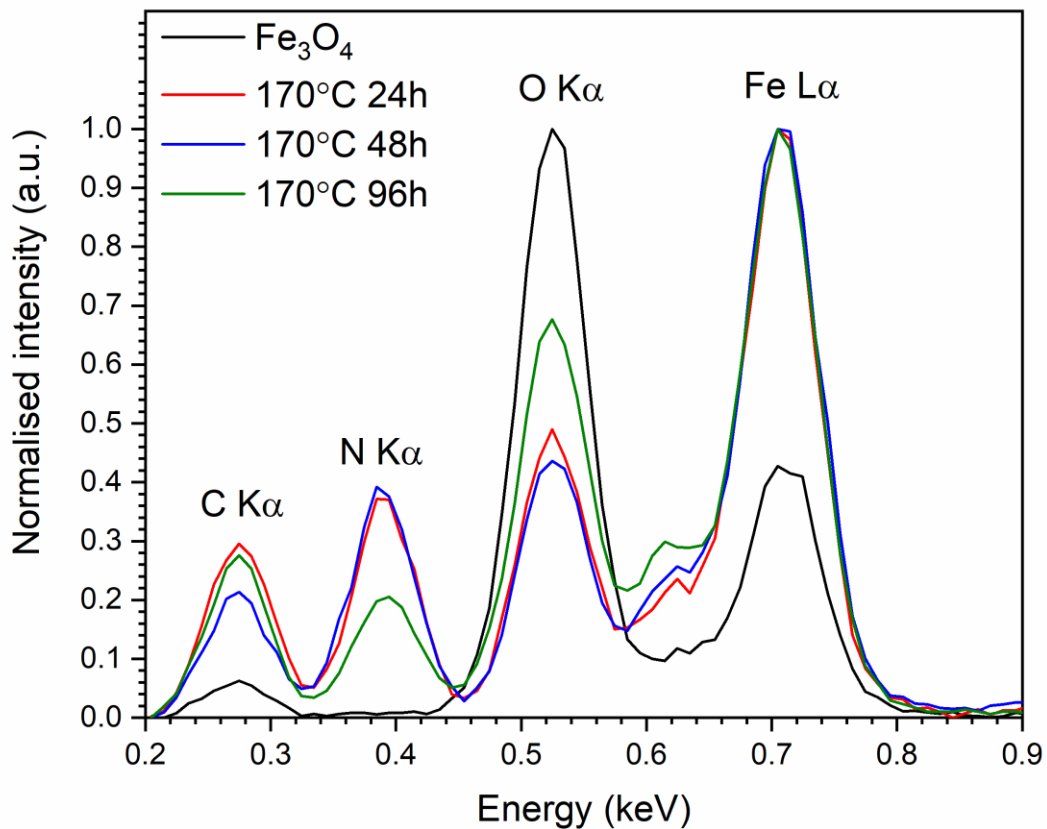

Figure S3: EDX spectra for starting Fe<sub>3</sub>O<sub>4</sub> reagent (black) and products of amide reactions at 170 °C for 24 / 48 / 96 h (red/blue/green). Note the presence of N K $\alpha$  emission only in the reaction products. C K $\alpha$  emission is attributed to the adhesive tab used for securing the powder during SEM measurement.

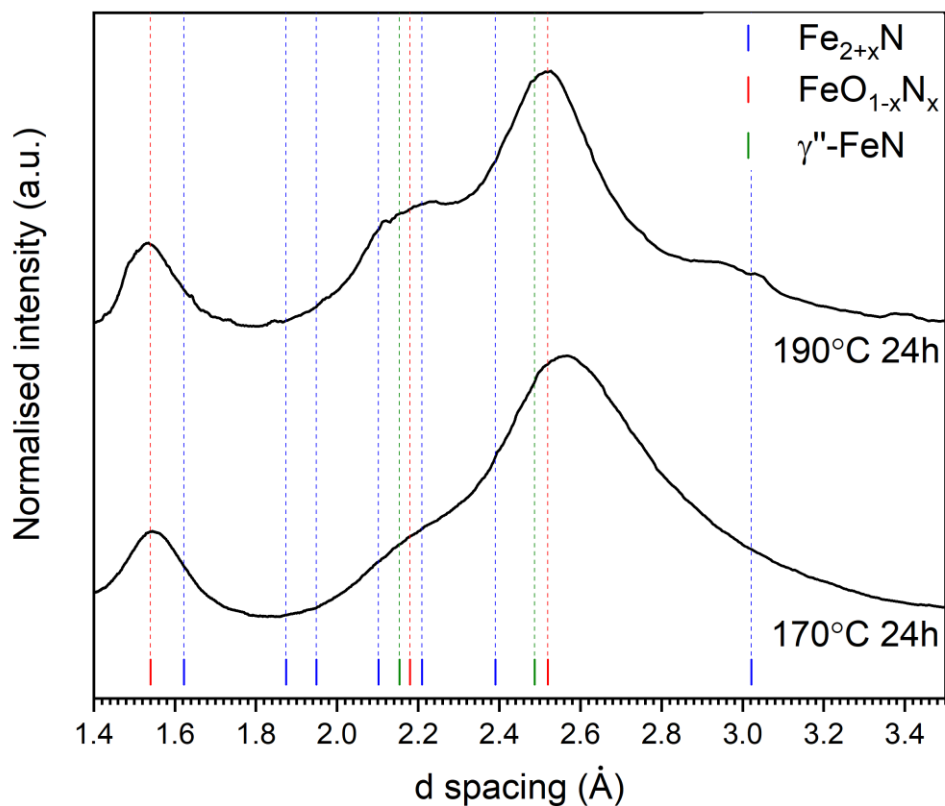

Figure S4: d spacing data integrated from electron diffraction linescans for (bottom) 170 °C / 24 h and (top) 190 °C / 24 h samples. Indexed are allowed reflections for  $\epsilon\text{-Fe}_{2+x}\text{N}$  (blue),  $\text{FeO}_{1-x}\text{N}_x$  (red) and  $\gamma''\text{-FeN}$  (green) confirming the findings from recrystallisation data of the presence of the oxynitride and nitride phases.

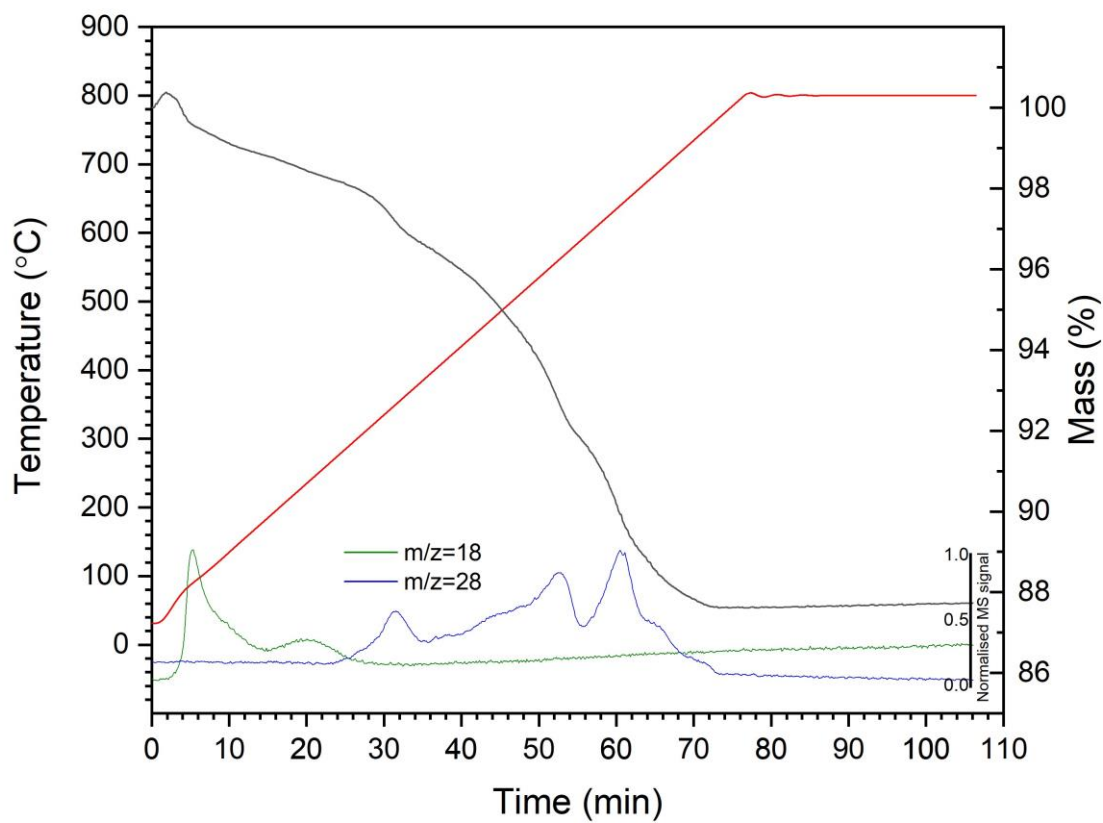

Figure S5: Thermogravimetry (TG, black) curve and mass spectrometry (MS) signals of 190 °C / 24 h product (mass numbers 18 and 28 represent H<sub>2</sub>O and N<sub>2</sub>).
